# Supplementary material for: Concurrent EGFR L858R and K860I mutations: PCR-negative but NGS-positive alterations that respond to EGFR inhibitors in non-small cell lung cancer
Source: Research Square preprint supplement (doi:10.21203/rs.3.rs-5234168/v1), 2024-10-23
Supplement: Supplementary file 1 [file 2baec108f1733a3895fdb541.docx]

| Supplementary table 3. EGFR-TKIs treatment response among patients with concurrent  EGFR L858R and uncommon exon 21 mutations. | | | | | | |
| --- | --- | --- | --- | --- | --- | --- |
|
| Case | Gender | Age | NGS | EGFR-TKIs | Optimal Response | PFS (months) |
| P1 | Female | 40 | p.R832H, p.L858R | Erlotinib | NA | NR |
| P2 | Male | 60 | p.V834L, p.L858R | Icotinib | SD | NR |
| P3 | Female | 63 | p.L833F, p.L858R | Icotinib | SD | 37.13 |
| P4 | Female | 49 | p.L858R, p.G873E | Icotinib | SD | 16.73 |
| P5 | Male | 69 | p.V834L, p.L858R | Icotinib | SD | 10.63 |
| P6 | Female | 62 | p.V834L, p.L858R | Icotinib | PR | 23.30 |
| P7 | Female | 68 | p.V834L, p.L858R | Gefitinib | NA | 22.23 |
| P8 | Female | 32 | p.L858R, p.H870R | Icotinib | PR | 12.00 |
| P9 | Male | 47 | p.L833V, p.L858R | Icotinib | PD | 1.63 |
| P10 | Male | 54 | p.L833V, p.L858R | Gefitinib | PR | 18.60 |
| P11 | Female | 56 | p.V834L, p.L858R | Erlotinib | SD | 8.43 |
| P12 | Female | 68 | p.L833V, p.L858R | Osimertinib | PR | 20.00 |
| P13 | Female | 61 | p.V834L, p.L858R | Gefitinib | NA | 10.17 |
| P14 | Female | 63 | p.L833V, p.L858R | Icotinib | SD | 4.97 |
| P15 | Female | 57 | p.L858R, p.A871G | Osimertinib | SD | NR |
| P16 | Female | 58 | p.V834L, p.L858R | Apatinib | PR | NR |
| P17 | Male | 42 | p.L858R, p.E865G | Osimertinib | SD | NR |
| P18 | Male | 59 | p.L858R, p.A871G | Osimertinib | NA | 8.00 |
| P19 | Female | 54 | p.L858R, p.A871E | Gefitinib | PR | NR |
| P20 | Female | 57 | p.L833V, p.L858R | Icotinib | SD | 18.40 |
| P21 | Male | 47 | p.H850Y, p.L858R | Dacotinib | PR | 16.20 |
| P22 | Female | 42 | p.V834L, p.L858R | Osimertinib | NA | NR |
| P23 | Female | 67 | p.L833F, p.L858R | Gefitinib | SD | NR |
