# Supplementary material for: Concurrent EGFR L858R and K860I mutations: PCR-negative but NGS-positive alterations that respond to EGFR inhibitors in non-small cell lung cancer
Source: Research Square preprint supplement (doi:10.21203/rs.3.rs-5234168/v1), 2024-10-23
Supplement: Supplementary file 2 [file d70391f57e3e37c1e5be66ba.docx]

| Supplementary table 2. Concurrent L858R and  uncommon EGFR exon 21 mutations in the study population. | |
| --- | --- |
|
|
| Concurrent L858R and EGFR exon 21 mutations | No (%) |
| R831H | 1 (1.85) |
| R832H | 1 (1.85) |
| L833F | 2 (3.70) |
| L833V | 7 (12.96) |
| L833I | 1 (1.85) |
| V834L | 13 (24.07) |
| R836C | 1 (1.85) |
| L838V | 1 (1.85) |
| L844V | 2 (3.70) |
| H850Y | 1 (1.85) |
| K860I | 10 (18.52) |
| G863D | 1 (1.85) |
| A864P | 1 (1.85) |
| E865G | 2 (3.70) |
| H870R | 3 (5.56) |
| A871E | 1 (1.85) |
| A871G | 4 (7.41) |
| G873E | 1 (1.85) |
| R889G | 1 (1.85) |
