# Supplementary material for: Concurrent EGFR L858R and K860I mutations: PCR-negative but NGS-positive alterations that respond to EGFR inhibitors in non-small cell lung cancer
Source: Research Square preprint supplement (doi:10.21203/rs.3.rs-5234168/v1), 2024-10-23
Supplement: Supplementary file 3 [file e8e3cb6962ab5bb869ce28ee.docx]

| Supplementary table 1 Clinicopathological feature of patients with  concurrent L858R and uncommon *EGFR exon 21* mutations. | |
| --- | --- |
|
| characteristics | Concurrent L858R and uncommon *EGFR exon 21* mutations  (N=54) |
| N (%) |  |
| Age, years old |  |
| Median (range) | 58.6 (32-75) |
| Sex |  |
| Male | 20 (37.0) |
| Female | 34 (62.9) |
| Smoking status |  |
| Never | 32 (59.2) |
| Ever | 10 (18.5) |
| NA | 12 (22.2) |
| Family history |  |
| No | 28 (51.8) |
| Yes | 9 (16.6) |
| NA | 17 (31.4) |
| Histology |  |
| Adenocarcinoma | 54 (100.0) |
| Non-adenocarcinoma | 0 (0.0) |
| Stage (AJCC) |  |
| I-II | 17 (31.5) |
| III-IV | 31 (83.78) |
| NA | 1 (1.8) |
| NA：not avaliable | |
